# Supplementary material for: Cosolvent-induced Spontaneous Refolding of Lipase
Source: Research Square preprint supplement (doi:10.21203/rs.3.rs-6737700/v1), 2025-06-16
Supplement: Supplementary file 1 [file 3d5d25bb05ca957c65b715a8.docx]

**Fig. 1**


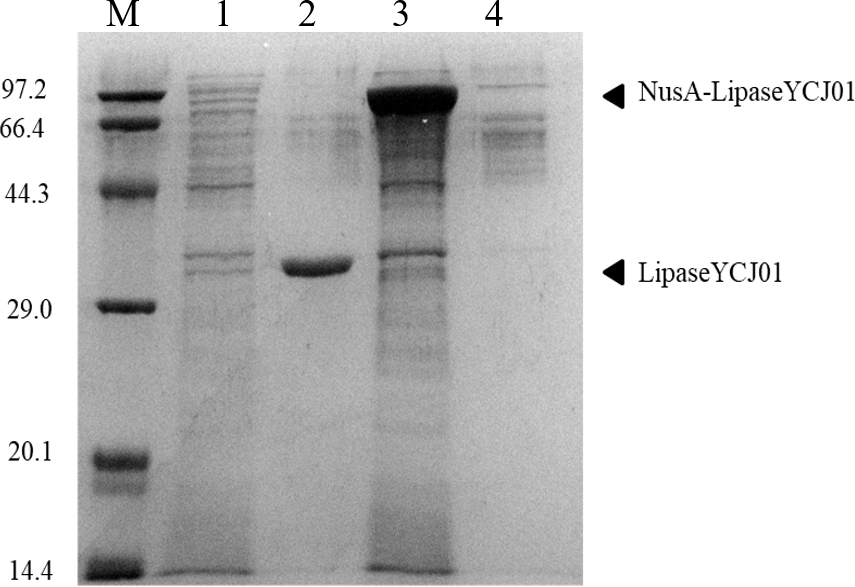


**Fig. 2**


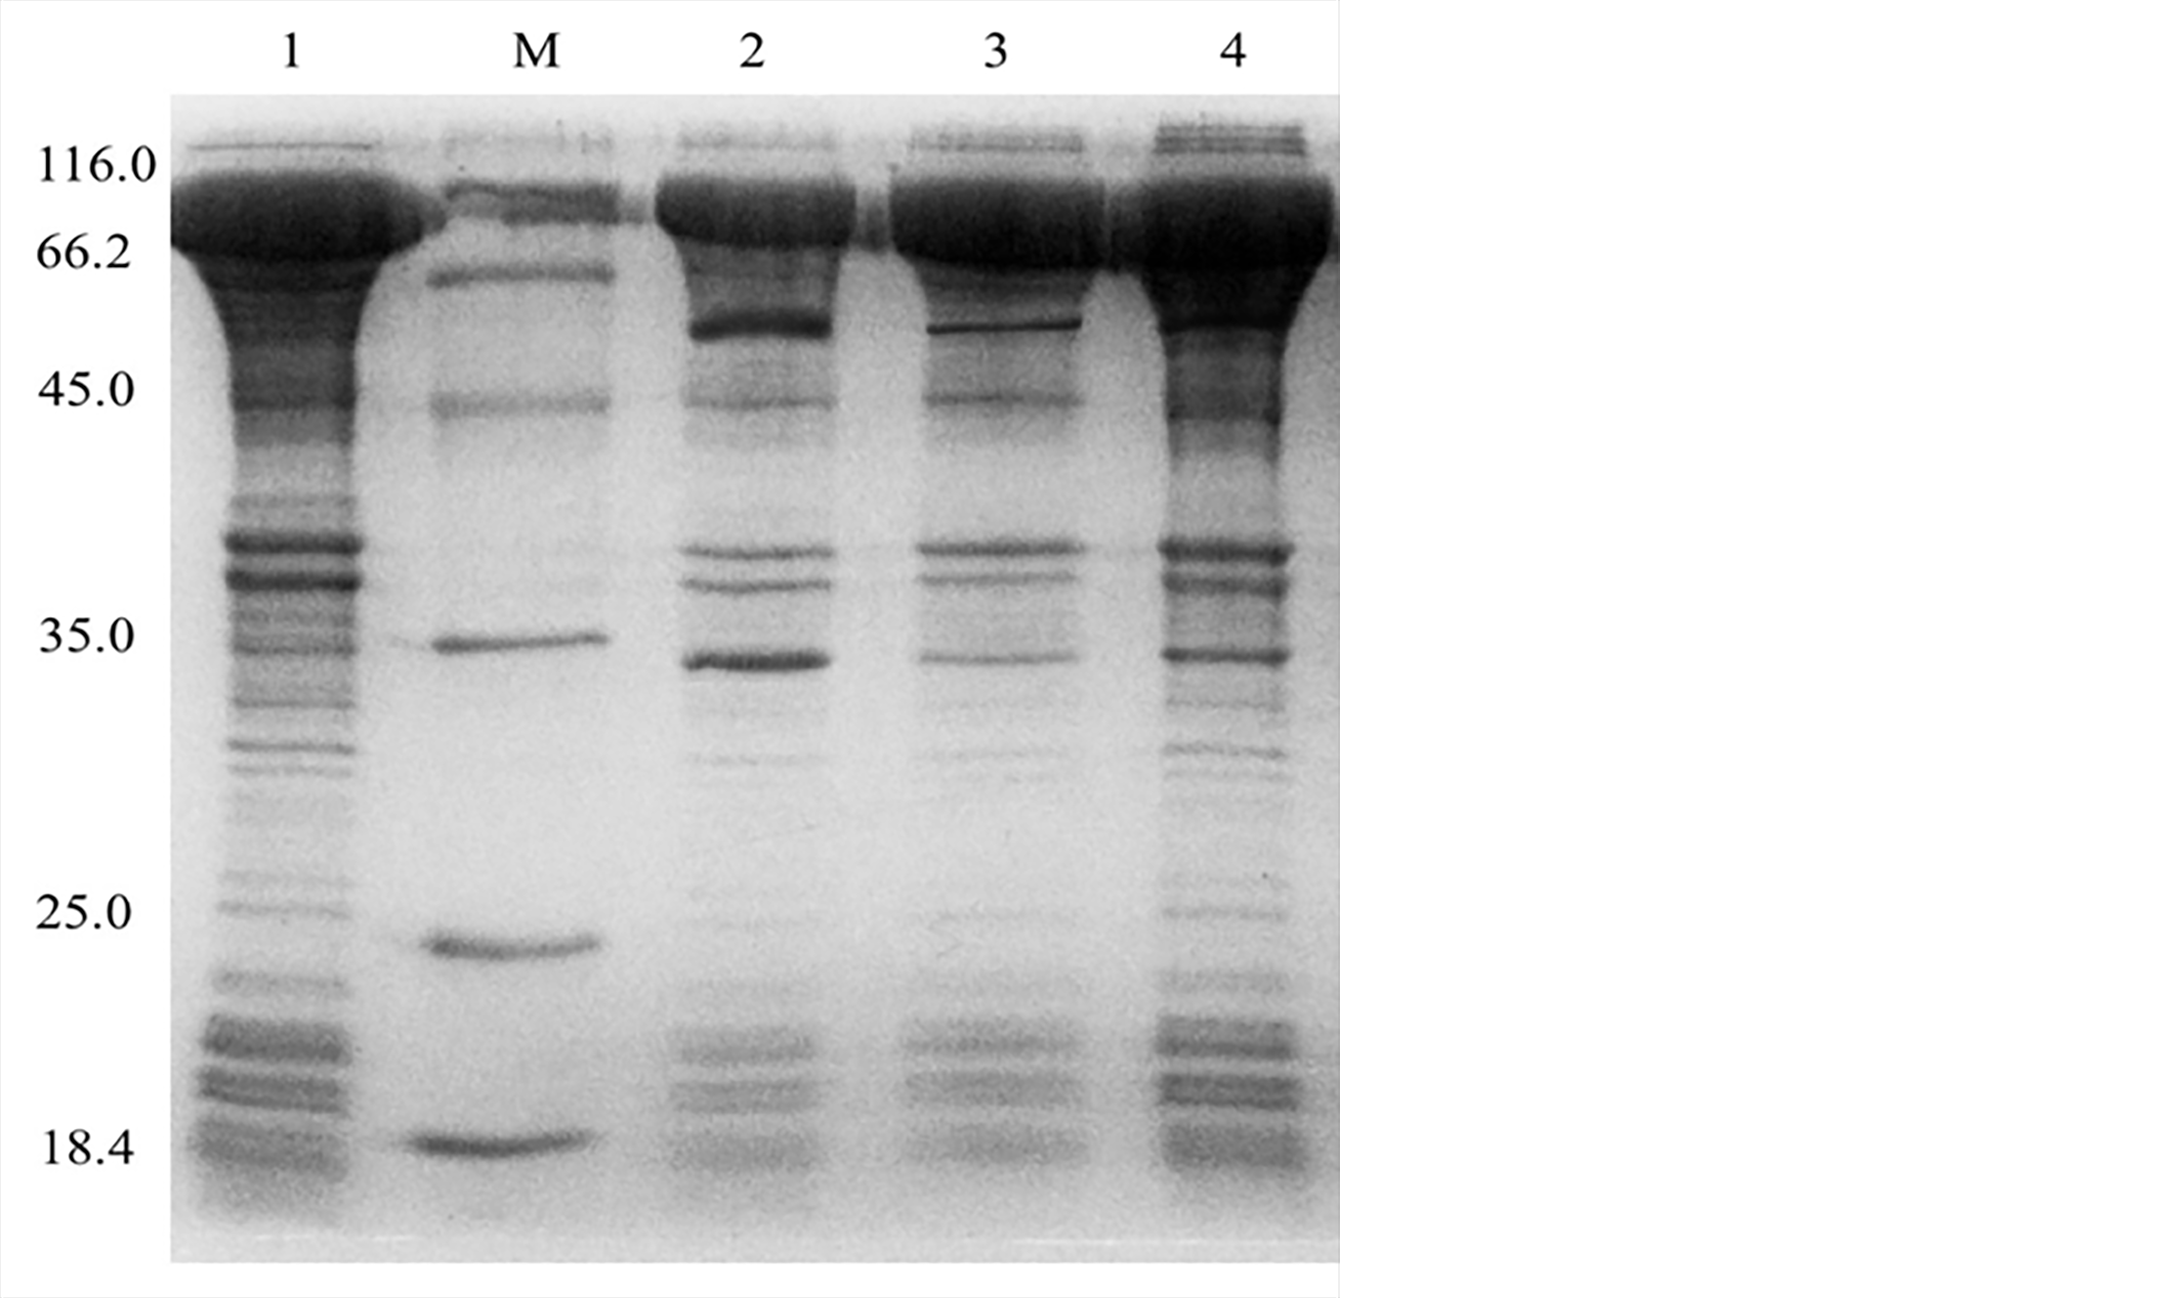


**LipaseYCJ01**

**NusA**

**NusA-LipaseYCJ01**


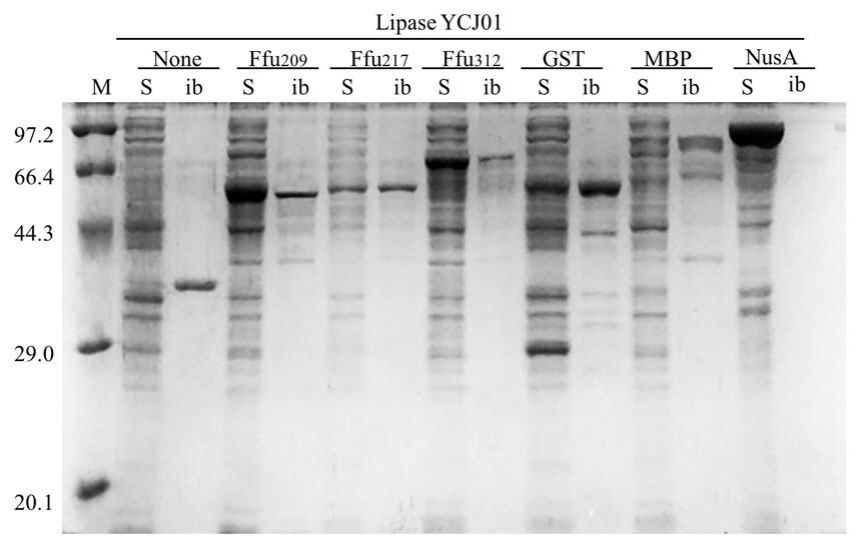


**We ensure the authenticity (reproducibility) and reliability of the images, and all provided SDS-PAGE images are original**.

**All the author**
