# Supplementary material for: Cosolvent-induced Spontaneous Refolding of Lipase
Source: Research Square preprint supplement (doi:10.21203/rs.3.rs-6737700/v1), 2025-06-16
Supplement: Supplementary file 2 [file 85a92c0692e6541fe41b5913.docx]

**Supplementary Information**

**Cosolvent-induced Spontaneous Refolding of Lipase**

Cheng Cheng1*, Yongqin Su3, Lupeng Cui2, Yumeng Qiu2, Jialing Wang2, Tianyue Jiang1*, Bingfang He1

1School of Pharmaceutical Sciences, Nanjing Tech University, No. 30 Puzhu South Road, Nanjing, 211816, China

2College of Biotechnology and Pharmaceutical Engineering, Nanjing Tech University, No. 30 Puzhu South Road, Nanjing, 211816, China

32011 College, Nanjing Tech University, No. 30 Puzhu South Road, Nanjing, 211816, China

*Corresponding author.

Cheng Cheng

E-mail address: Cheng2@njtech.edu.cn

Tianyue Jiang

E-mail address: tjiang@njtech.edu.cn

**Table S1** Primers used in this study

| Primers | Sequences |
| --- | --- |
| F1 | CATGCCATGGGCAACAAAGAAATTTTGGCTGTAGTTG |
| R1 | ATAAAGCTTCGCTTCGTCACCGAACCAGCAAATA |
| F2 | ATAAAGCTTCTGGTGCCACGCGGTTCTGCAACCGCGCCGGCGGACG |
| R2 | GCCTCGAGCACGCCCGCGAGTTTCAG |
| Ffu-lipaseF | GGAATTCCATATGCAACCGCGCCGGCGGA |
| Ffu-lipaseR | CCGCTCGAGCACGCCCGCGAGTTTCAGC |
| MBP-lipaseF | ATAGGATCCGGCAACCGCGCCGGCGGAC |
| MBP-lipaseR | GCAAGCTTCACGCCCGCGAGTTTCAGCCG |
| GST-lipaseF | ATAGGATCCGGCAACCGCGCCGGCGGAC |
| GST-lipaseR | ATAGCGGCCGCCACGCCCGCGAGTTTCAGCCG |

**Table S2** The detailed system parameters

| system | Solvent molecules | Box size | Simulation time |
| --- | --- | --- | --- |
| Pure water | Water: 20062 | 8.67*8.67*8.67nm3 | 100ns |
| 20% glycerol | Water: 14114 glycerol: 1344 | 8.67*8.67*8.67nm3 | 100ns |
| 15% DMSO | Water: 17381 DMSO: 830 | 8.67*8.67*8.67nm3 | 100ns |
| 4M TMAO | Water: 15927 TMAO: 800 | 8.67*8.67*8.67nm3 | 100ns |

Formulas for calculating the number of solvent molecules in different systems:

1. For 20% Glycerol and 15% DMSO Systems:

·Number of solute molecules:

(1)

1. For 4M TMAO System:

·Number of solute molecules:

(2)


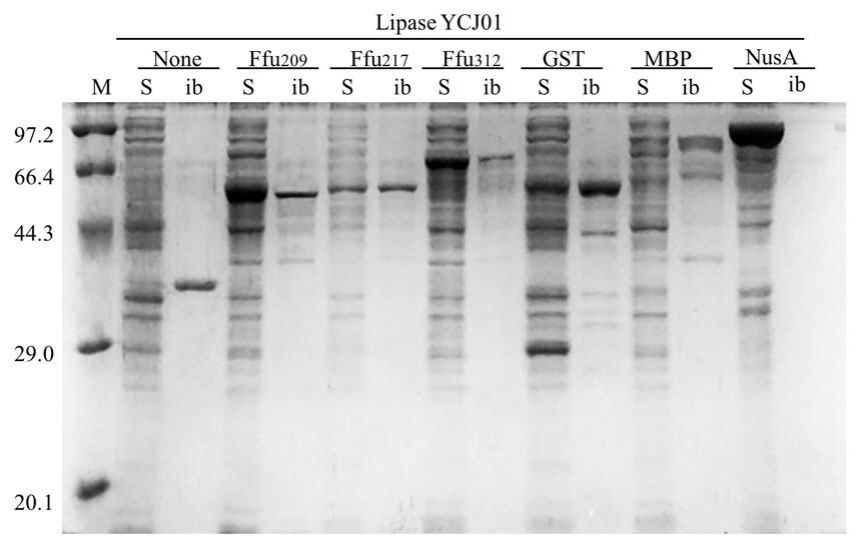


**Fig. S1** Solubility enhancing effects of fusion tags (Ffu209, Ffu217, Ffu312, GST, MBP, and NusA) on lipase YCJ01


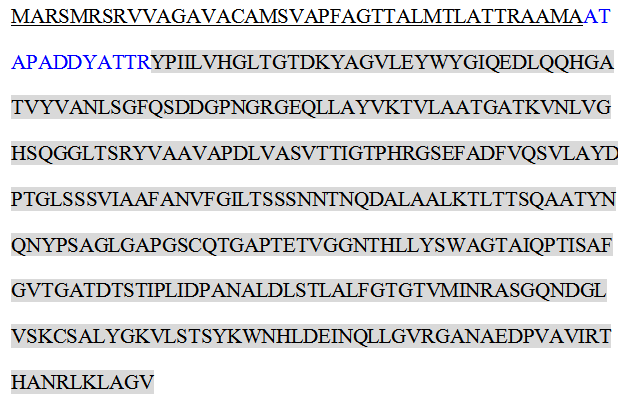


**Fig. S2.** The amino acid sequence of lipase YCJ01 is presented below. The signal peptide is underlined, the propeptide is highlighted in blue, and the mature lipase YCJ01 is shaded


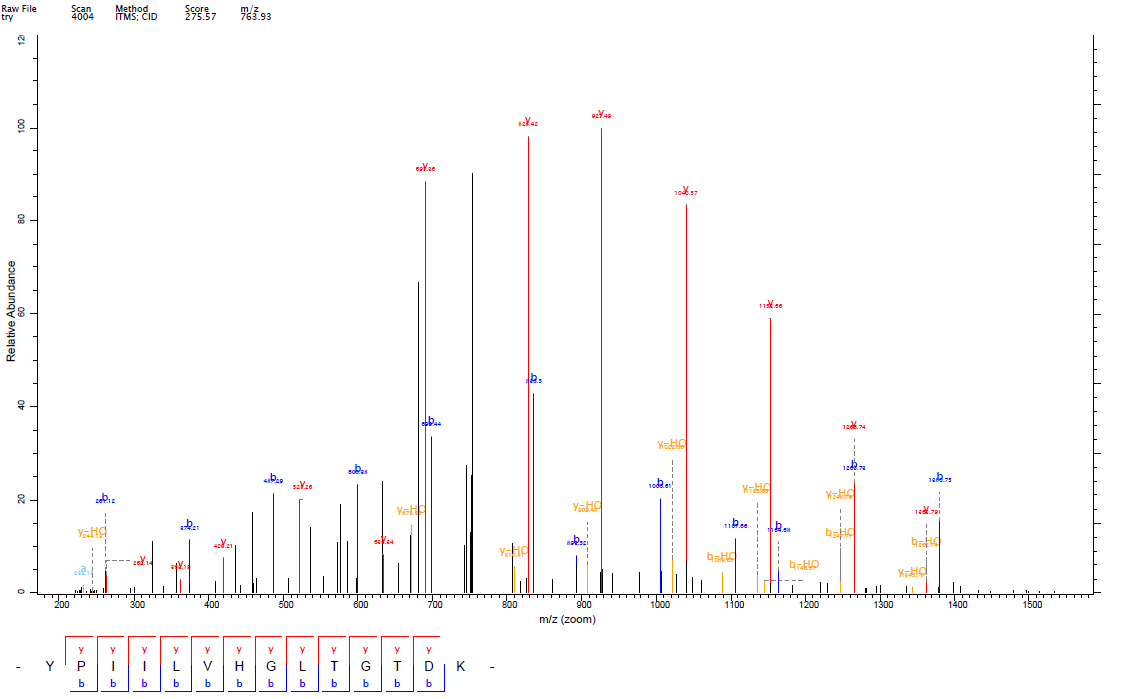


**Fig. S3** NanoLC-MS/MS analysis of lipase YCJ01 after self-cleaving by chymotrypsin digestion
